# Supplementary material for: Green Synthesis, Characterization, and Biological Evaluation of 2,4,5-Trichloro-N-phenylbenzamide Derivatives Using Bunium Persicum Extracted MnO2 Catalyst
Source: Research Square preprint supplement (doi:10.21203/rs.3.rs-7428309/v1), 2025-09-12
Supplement: Supplementary file 1 [file ac1deffb523724cb42372bf7.docx]

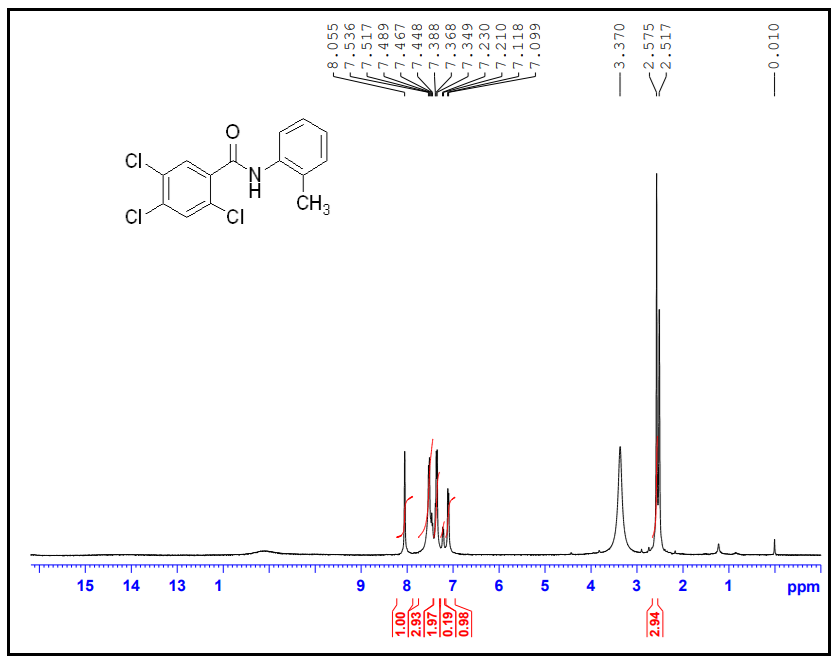


**Figure 1:** 1H NMR Spectrum of **2a**

**
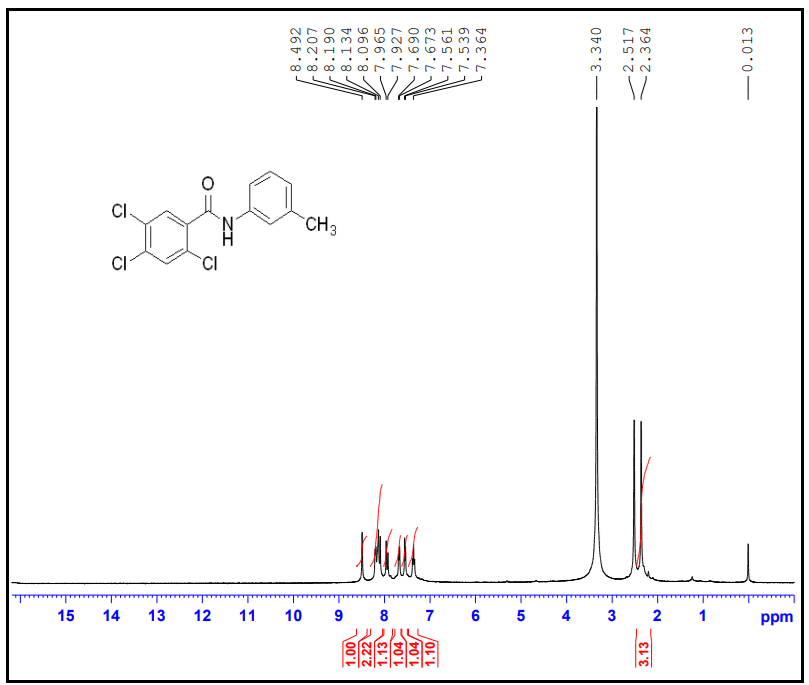
**

**Figure 2:** 1H NMR Spectrum of **2b**

**
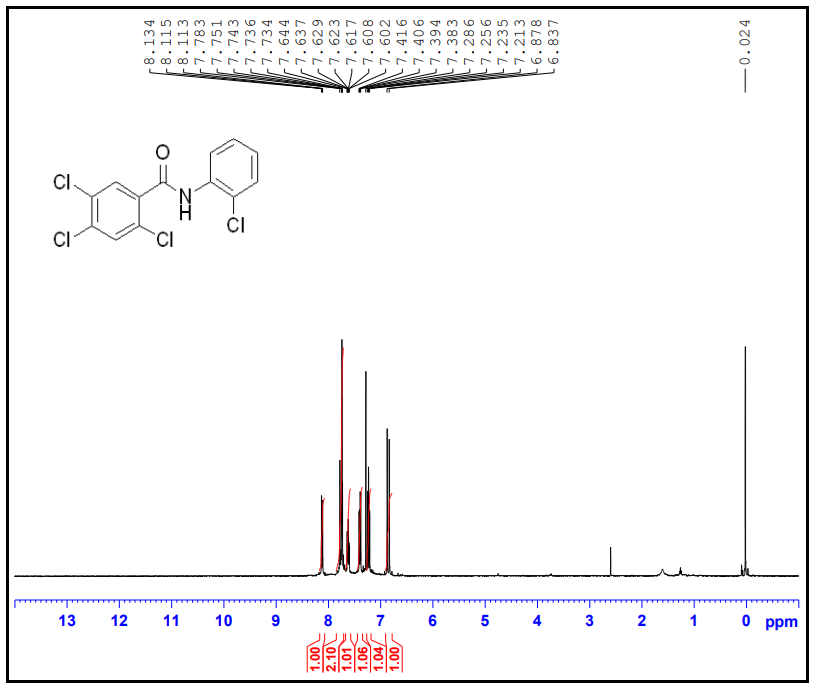
Figure 3:** 1H NMR Spectrum of **2c**

**
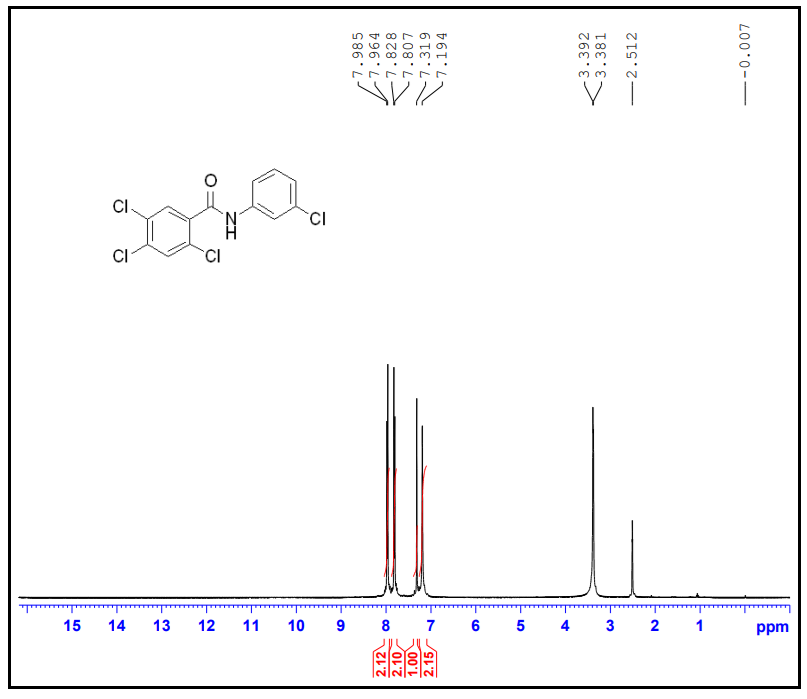
**

**Figure 4:** 1H NMR Spectrum of **2d**

**
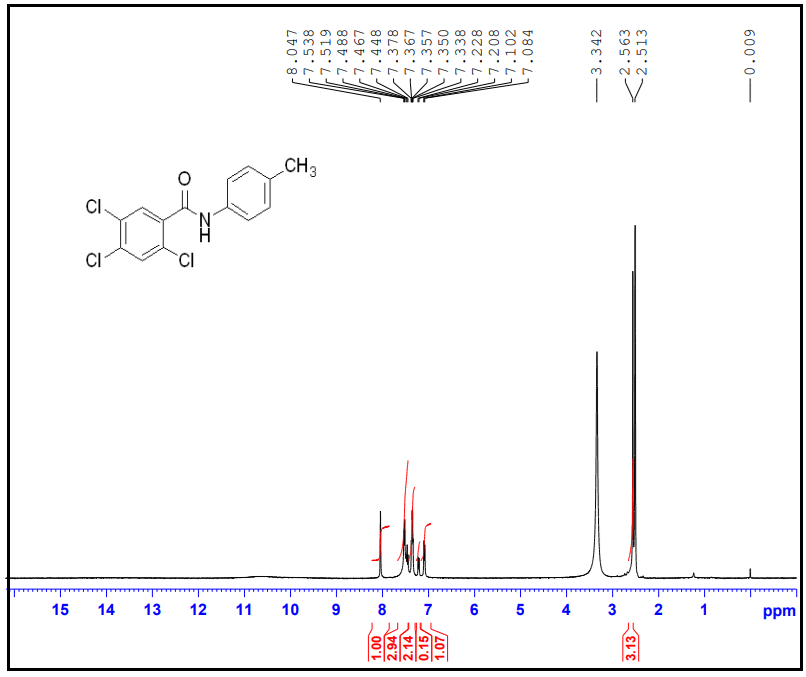
**

**Figure 5:** 1H NMR Spectrum of **2e**

**
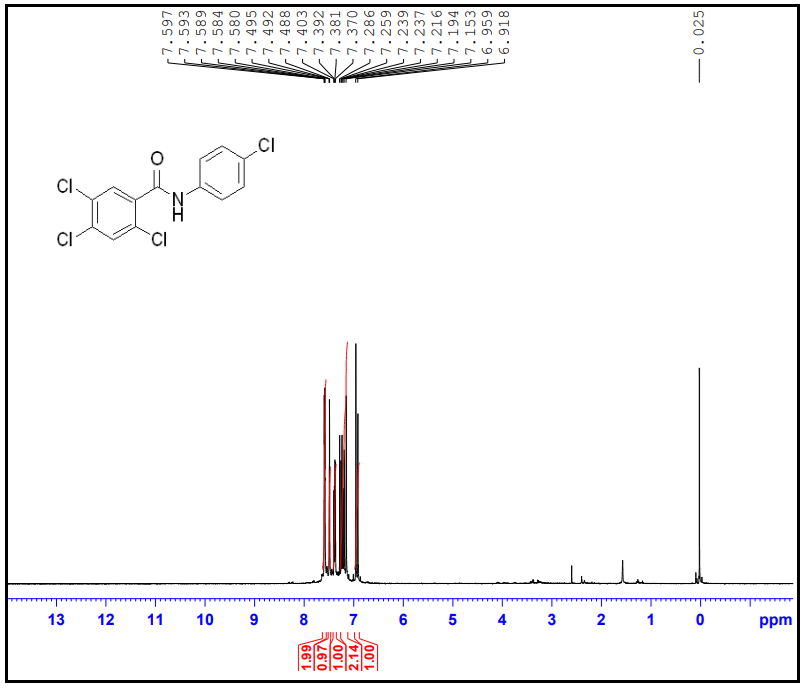
**

**Figure 6:** 1H NMR Spectrum of **2f**

**
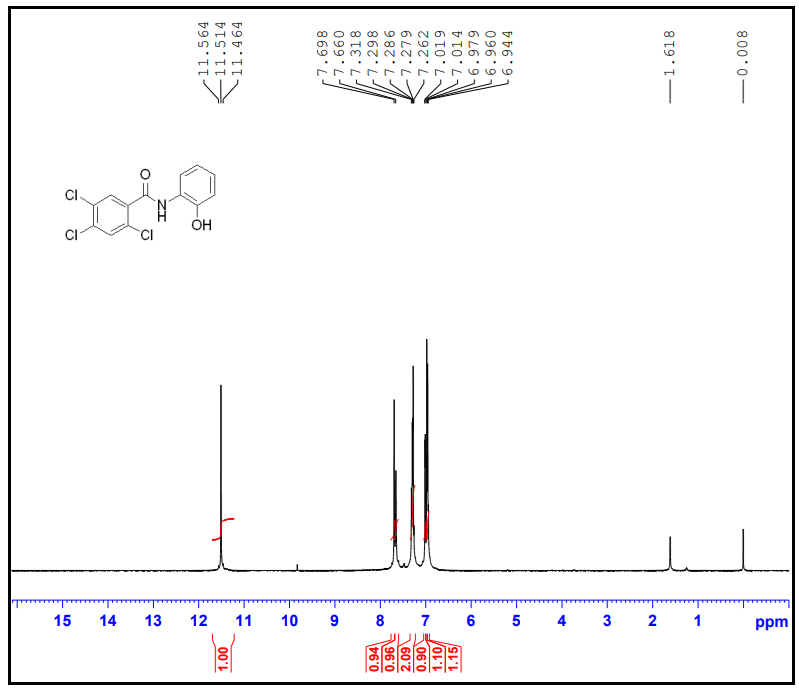
**

**Figure 7:** 1H NMR Spectrum of **2g**

**
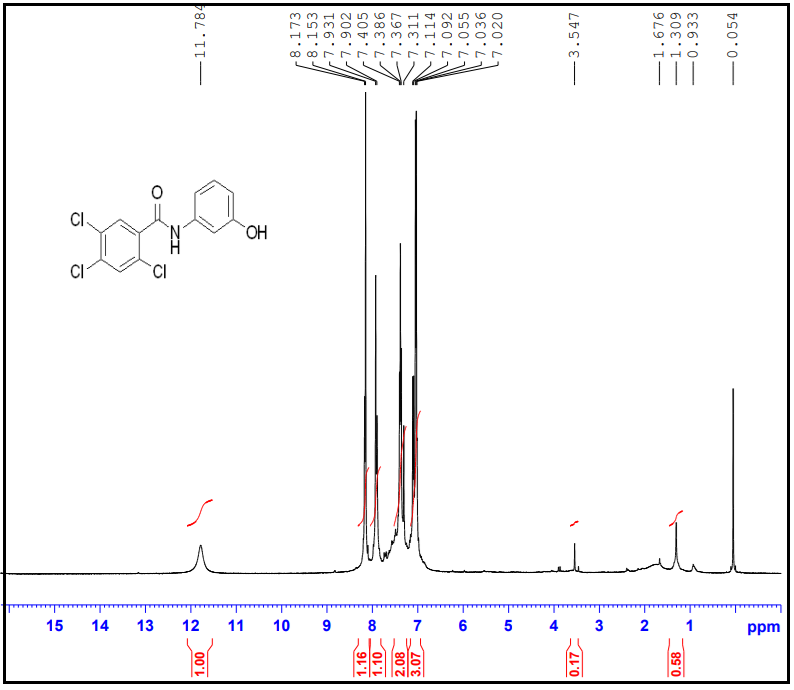
**

**Figure 8:** 1H NMR Spectrum of **2h**


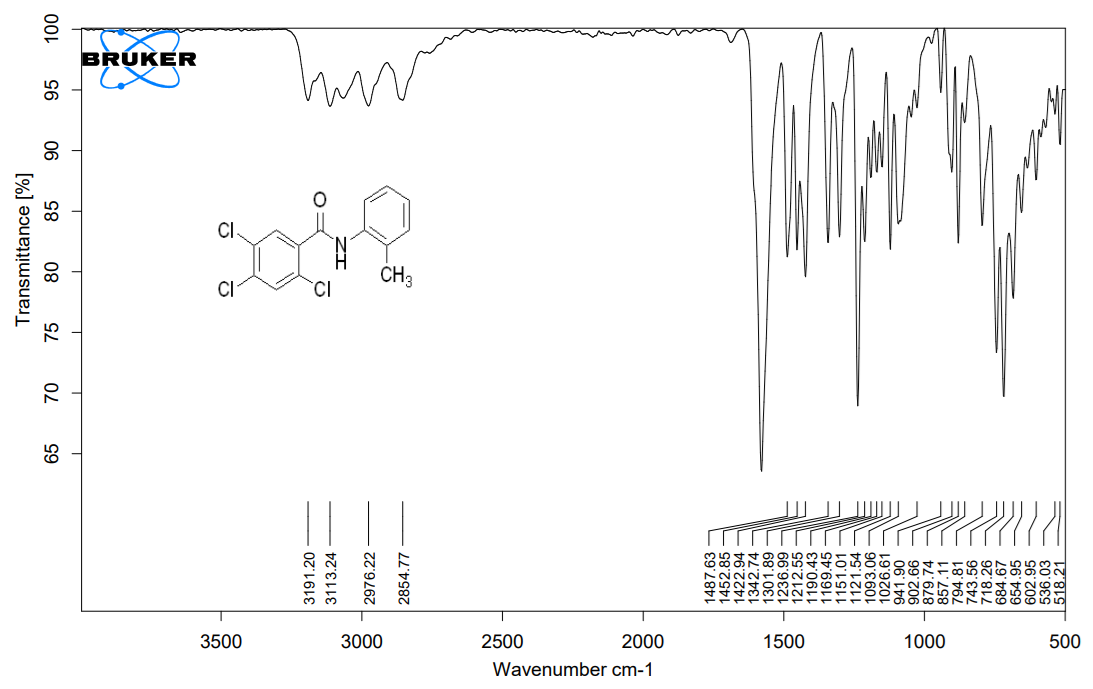


**Figure 9:** FTIR Spectrum of **2a**

**
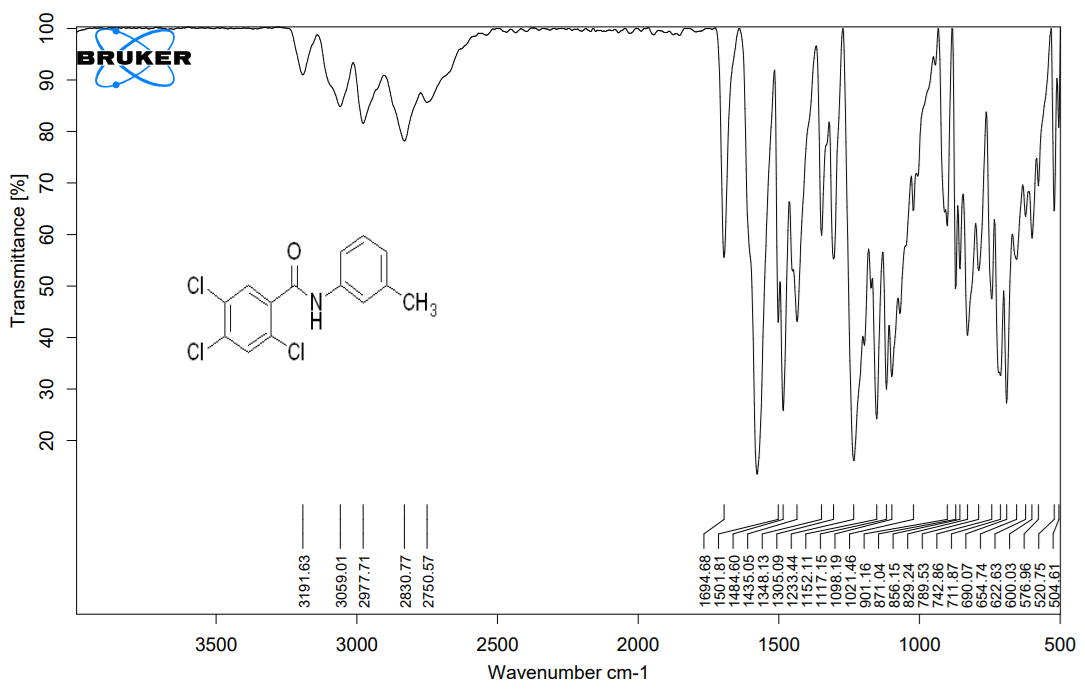
**

**Figure 10:** FTIR Spectrum of **2b**

**
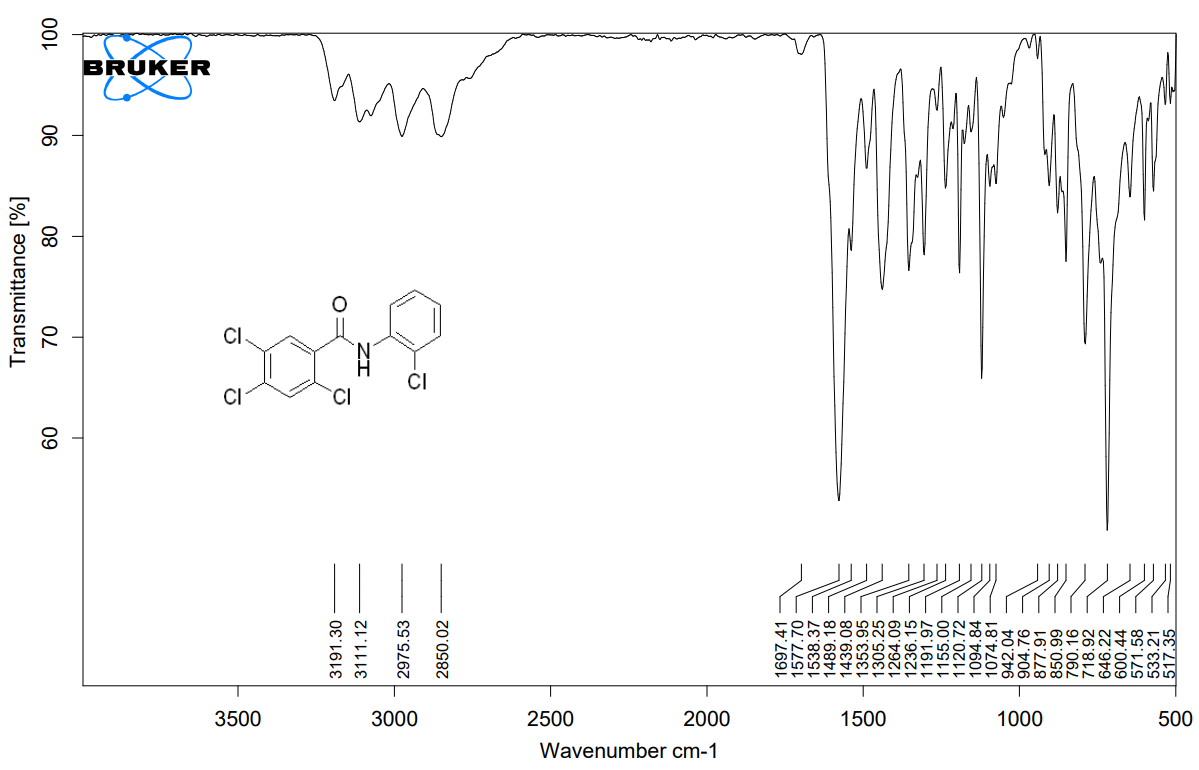
**

**Figure 11:** FTIR Spectrum of **2c**

**
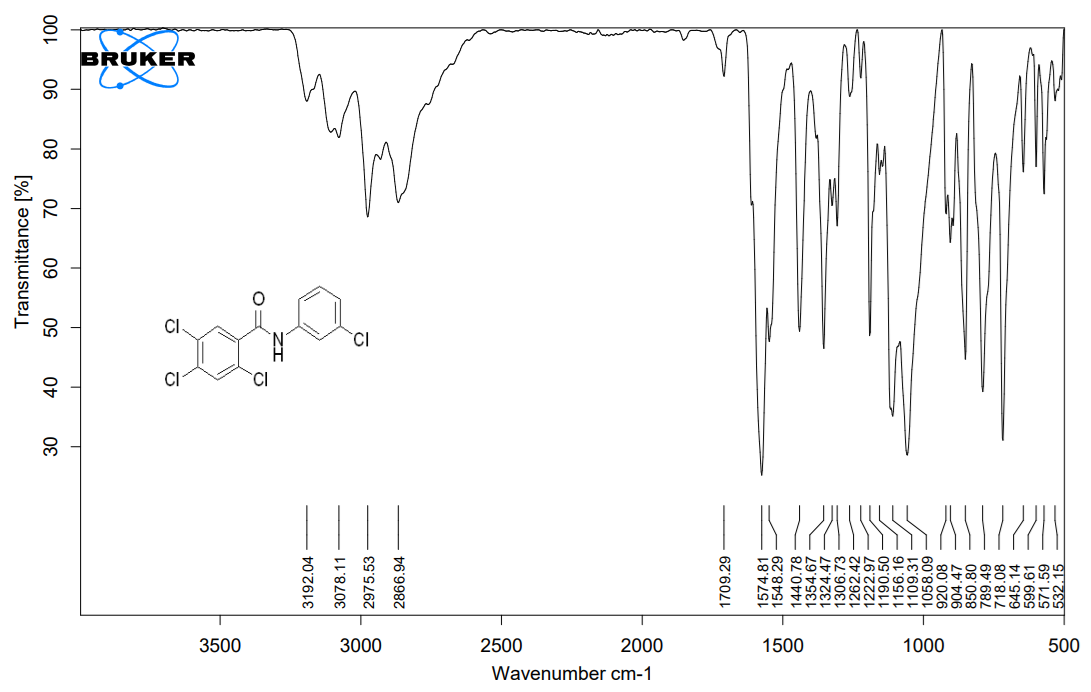
**

**Figure 12:** FTIR Spectrum of **2d**

**
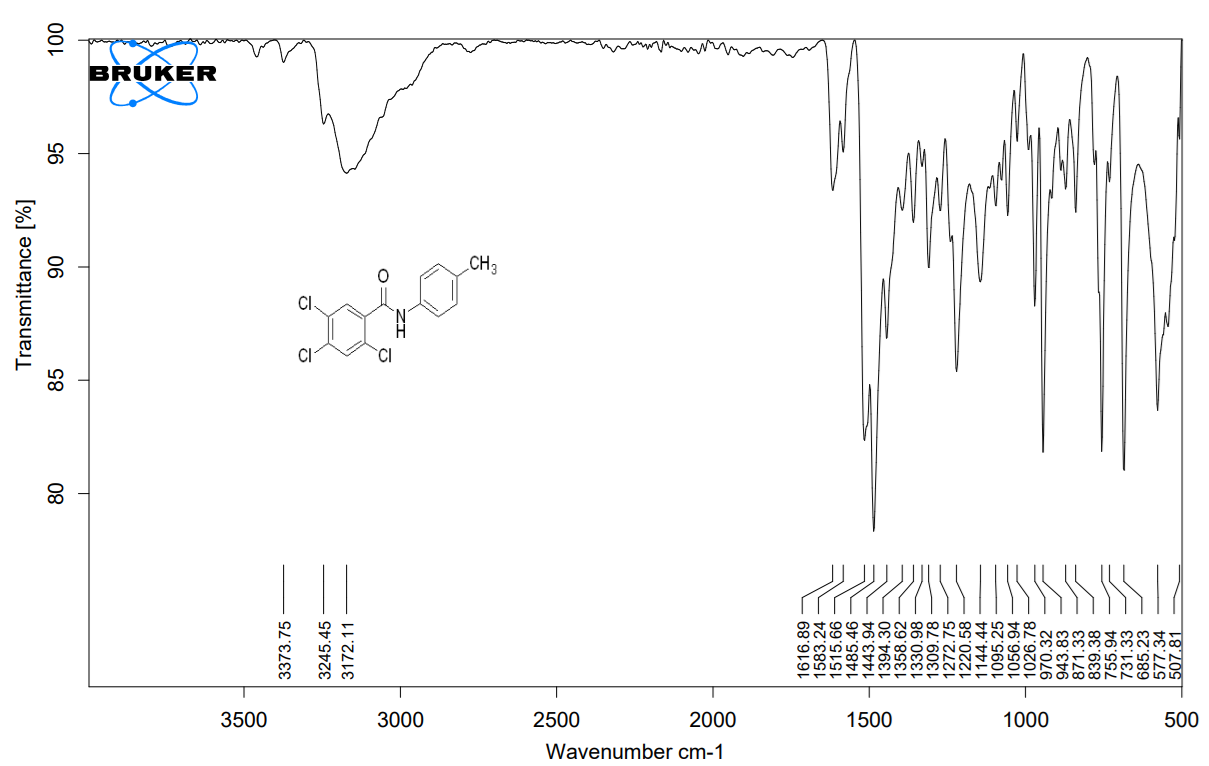
**

**Figure 13:** FTIR Spectrum of **2e**

**
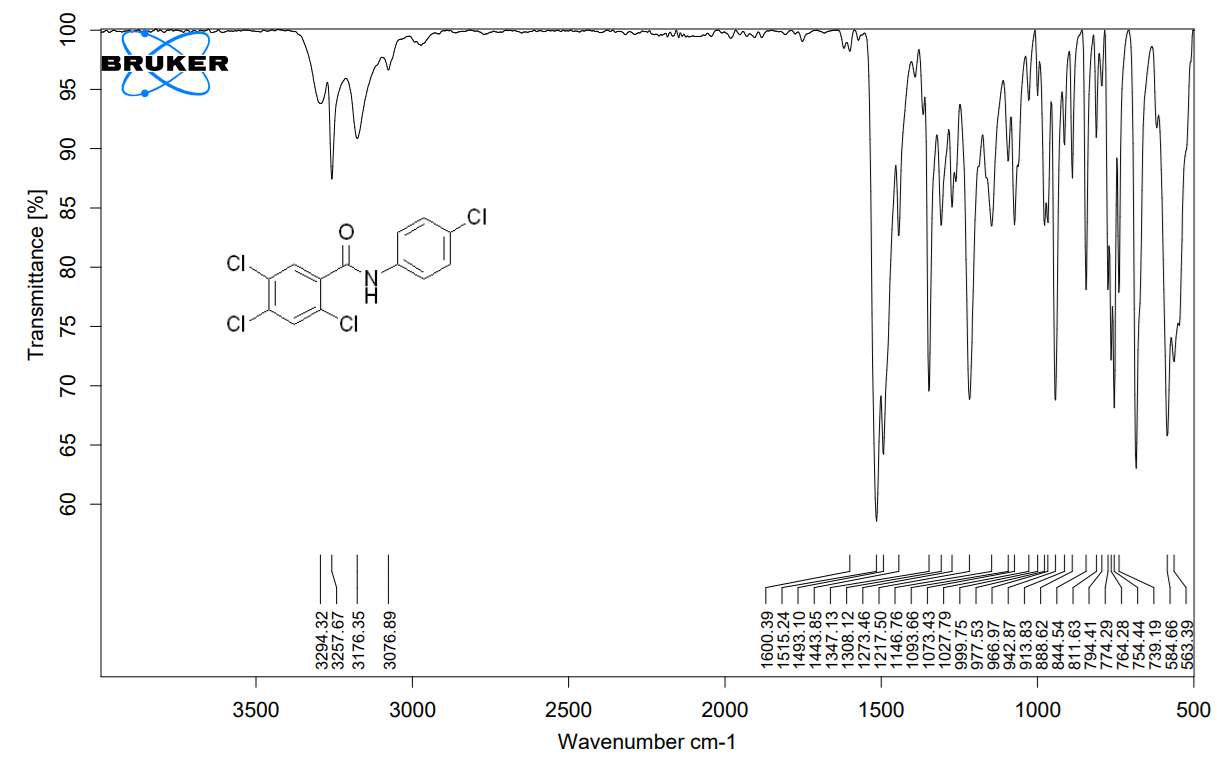
**

**Figure 14:** FTIR Spectrum of **2f**

**
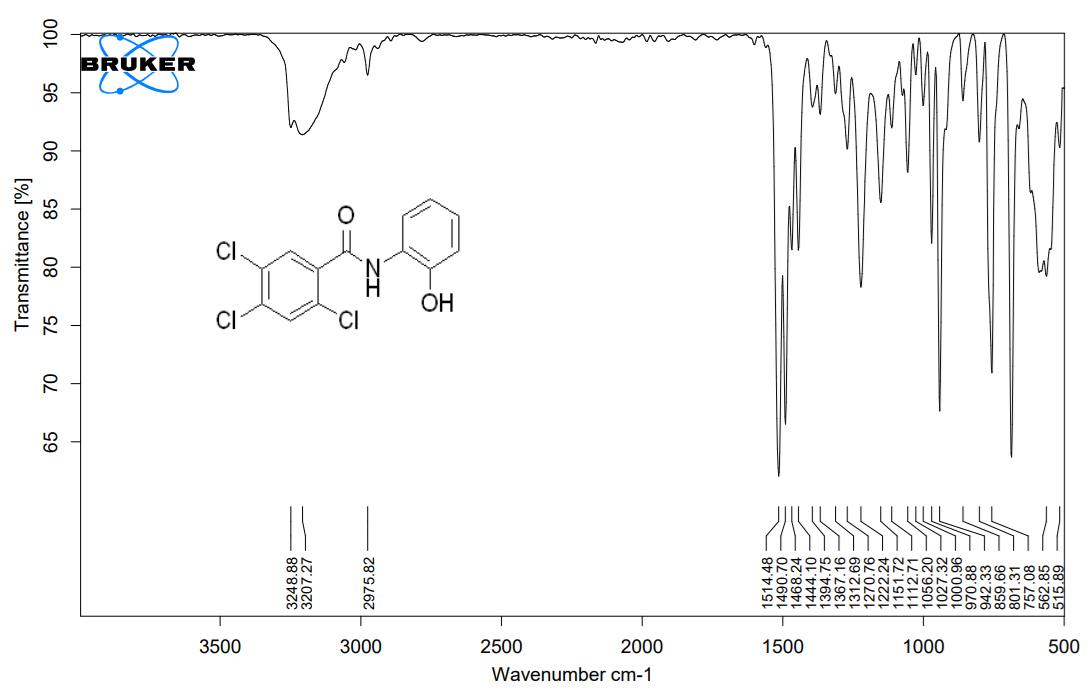
**

**Figure 15:** FTIR Spectrum of **2g**

**
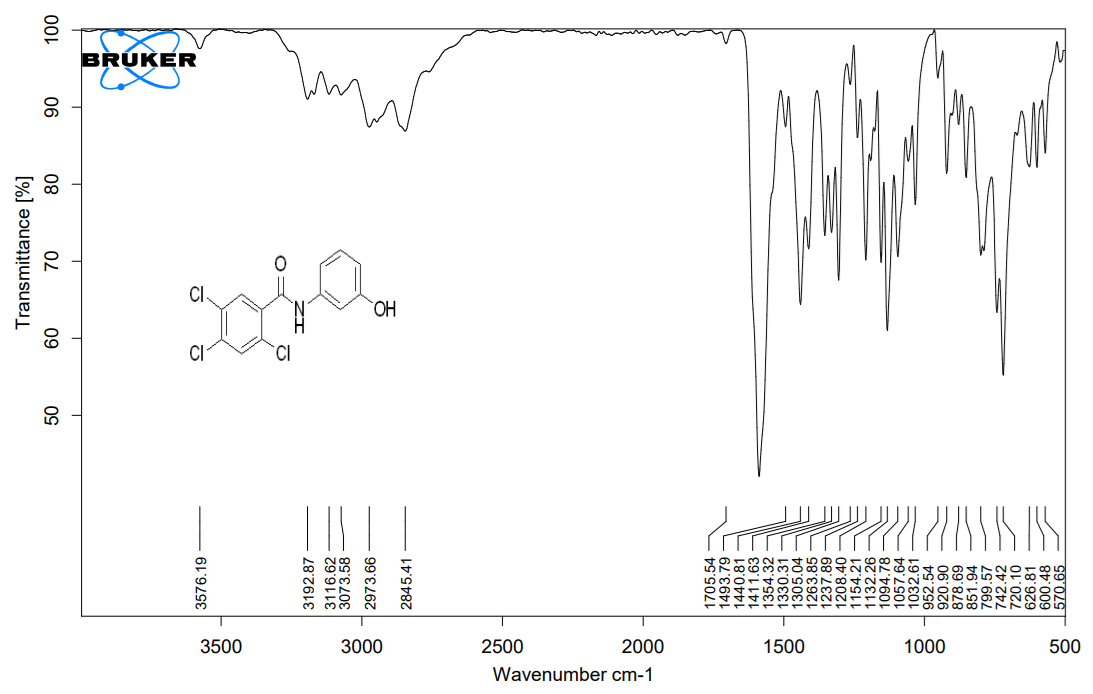
**

**Figure 16:** FTIR Spectrum of **2h**


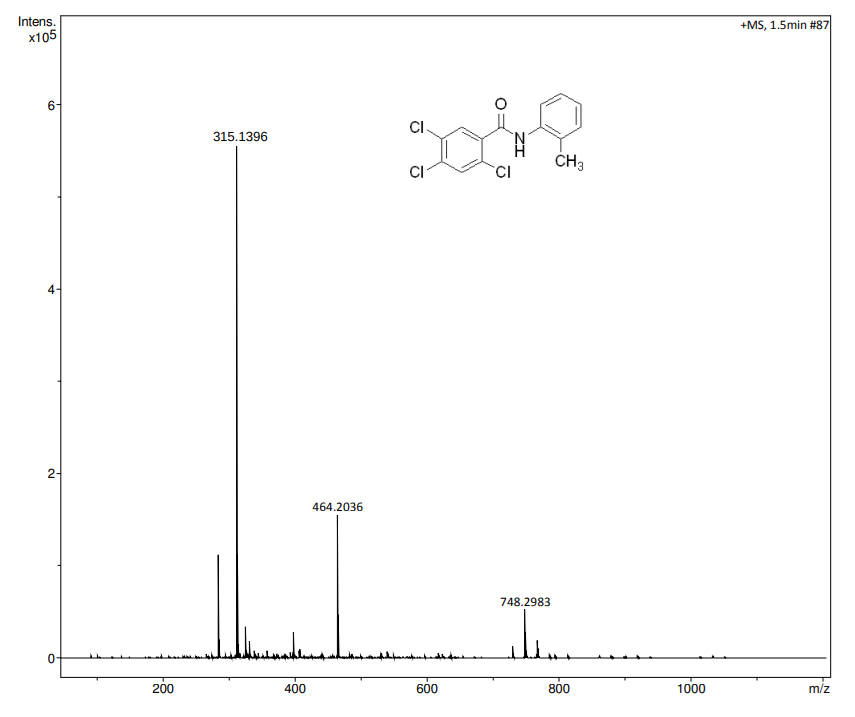


**Figure 17:** HRMS Spectrum of **2a**

**
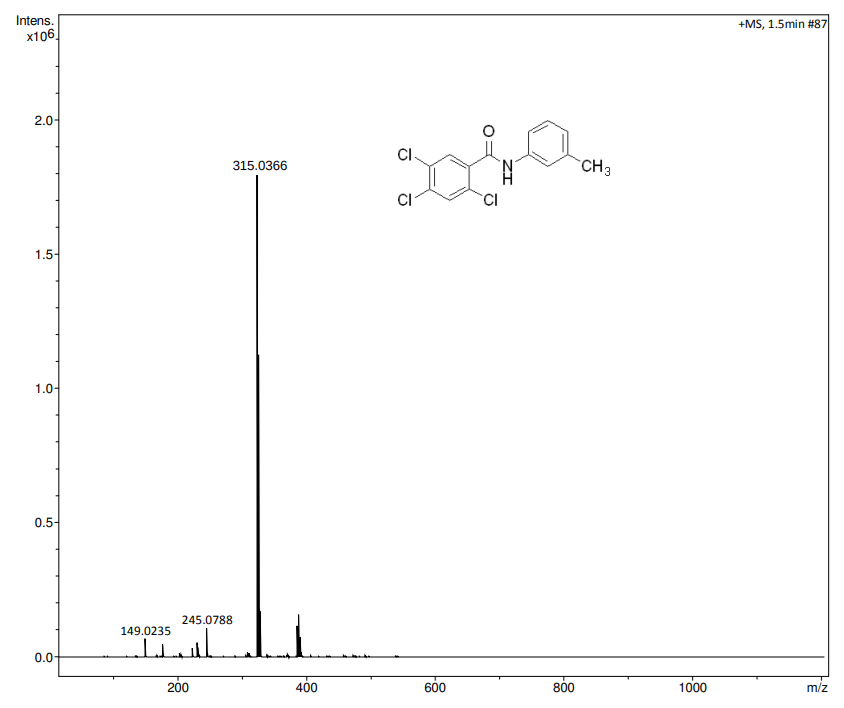
**

**Figure 18:** HRMS Spectrum of **2b**

**
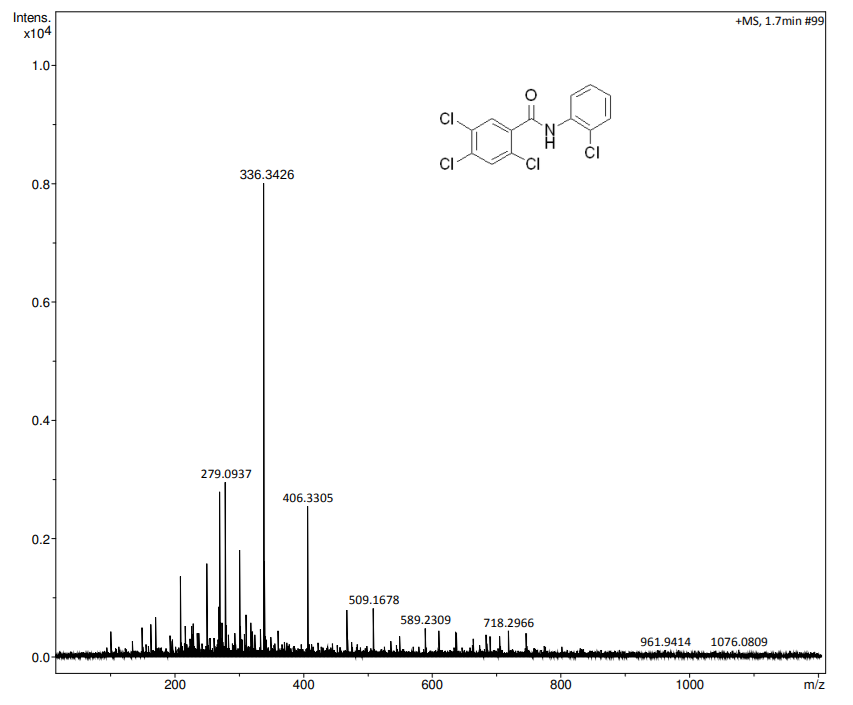
**

**Figure 19:** HRMS Spectrum of **2c**

**
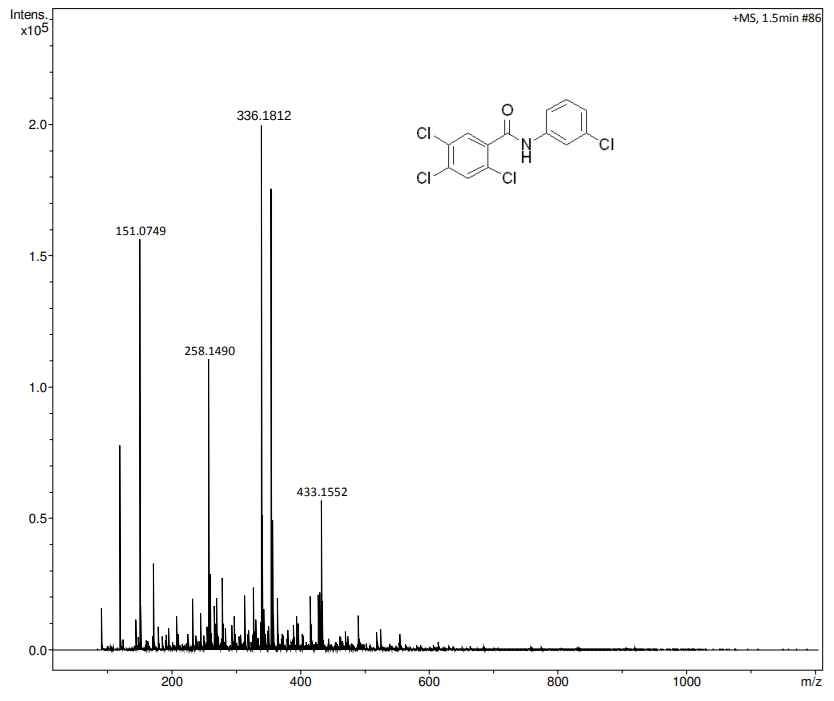
**

**Figure 20:** HRMS Spectrum of **2d**

**
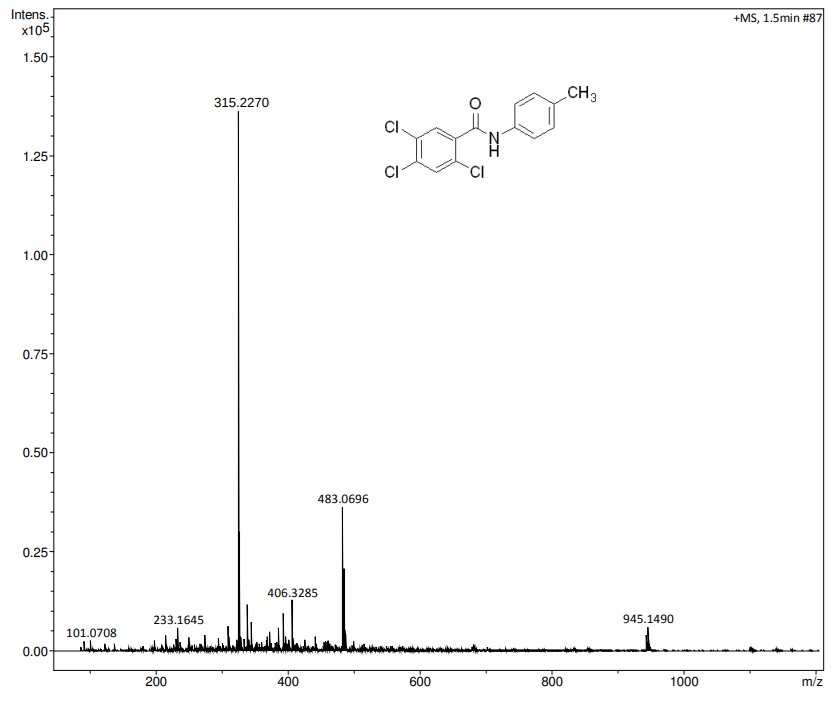
**

**Figure 21:** HRMS Spectrum of **2e**

**
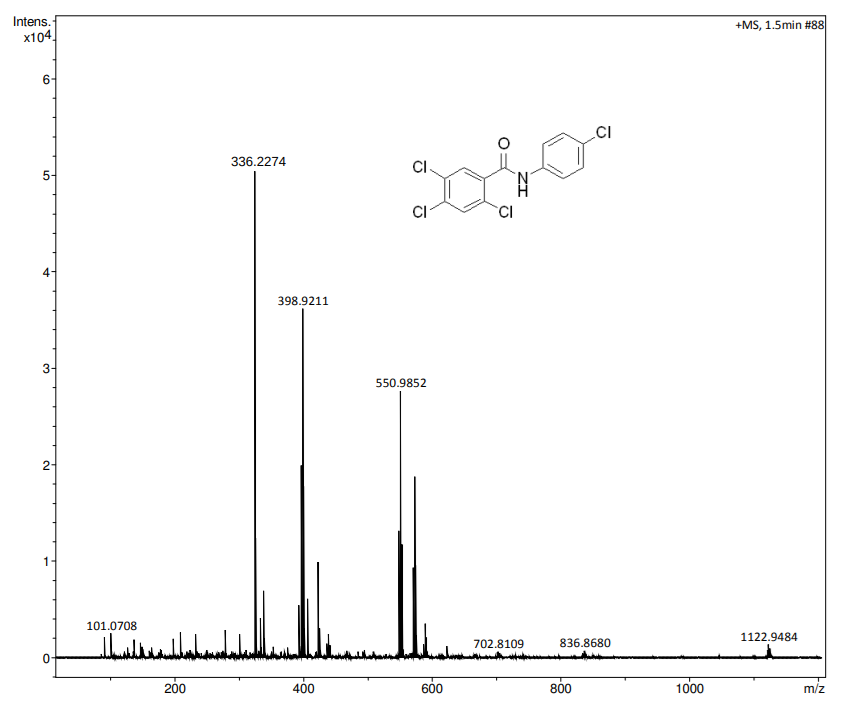
**

**Figure 22:** HRMS Spectrum of **2f**

**
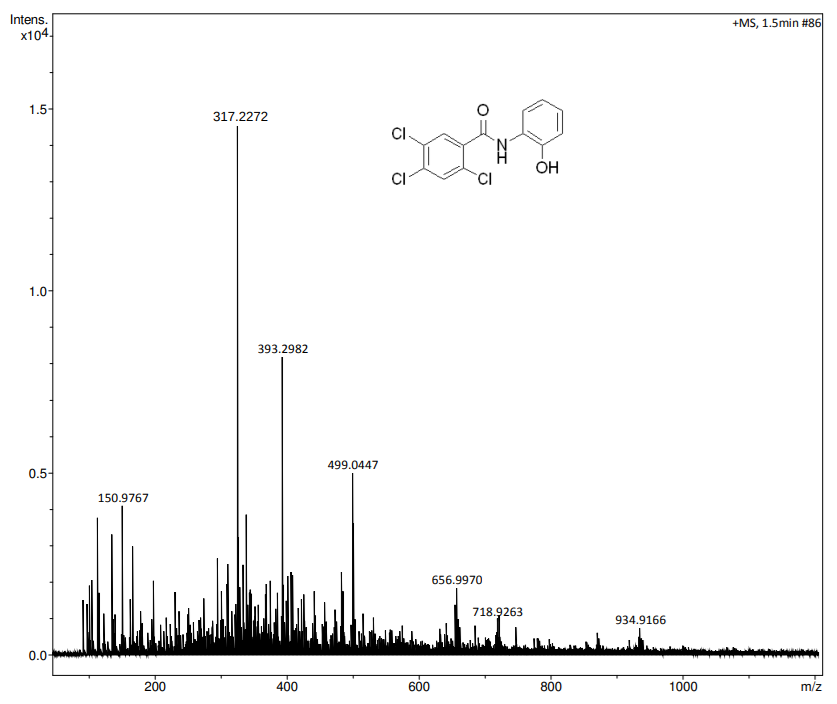
**

**Figure 23:** HRMS Spectrum of **2g**

**
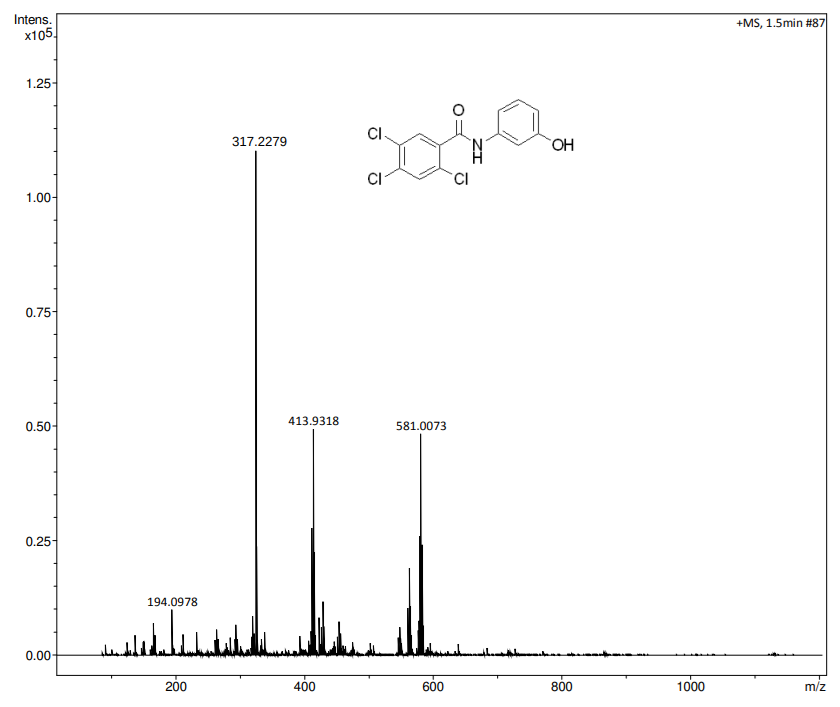
**

**Figure 24:** HRMS Spectrum of **2h**

**
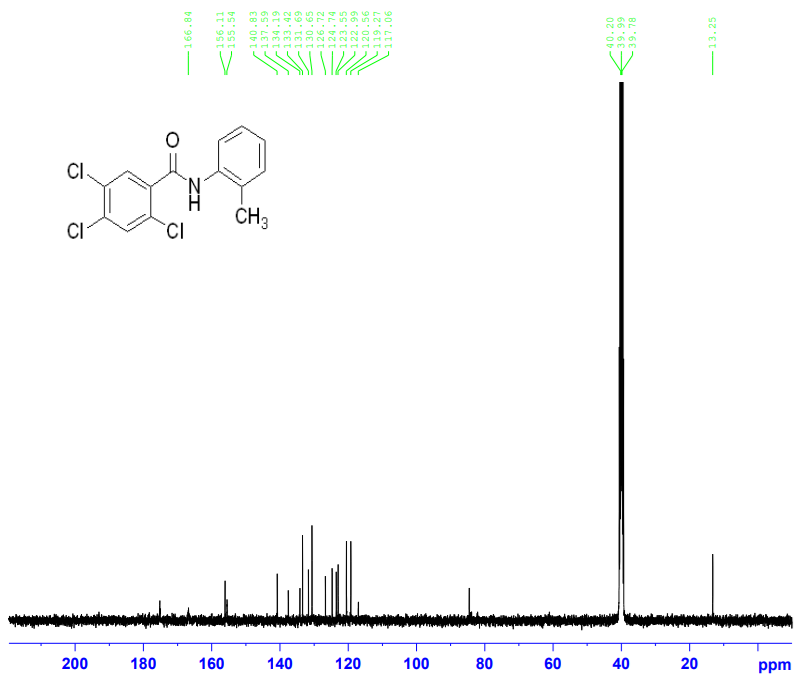
**

**Figure 25:** 13C NMR Spectrum of **2a**

**
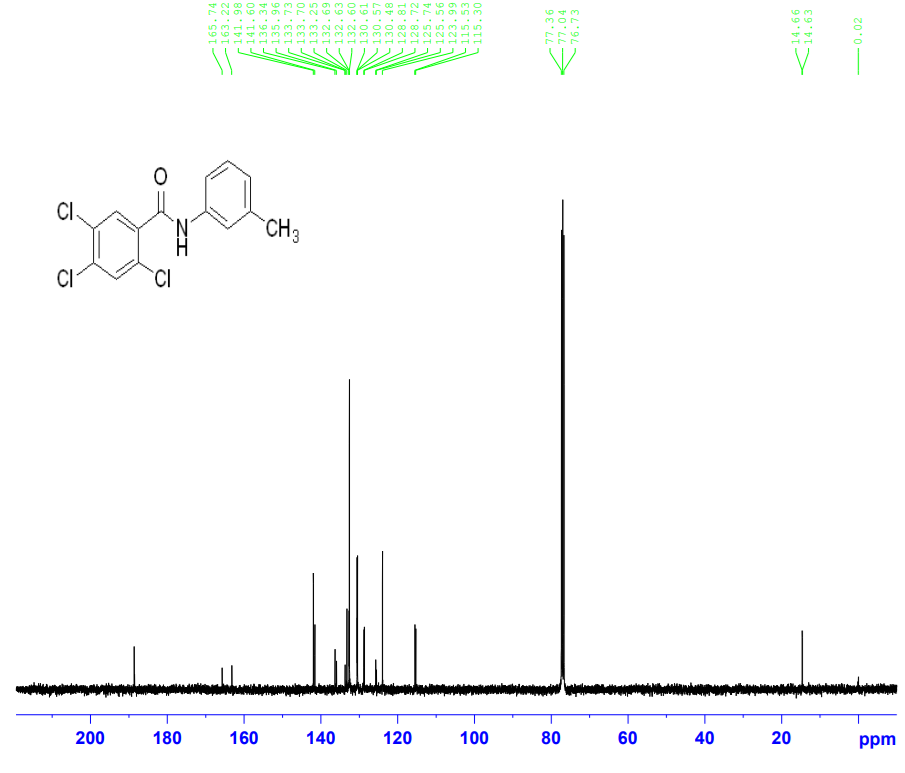
**

**Figure 26:** 13C NMR Spectrum of **2b**


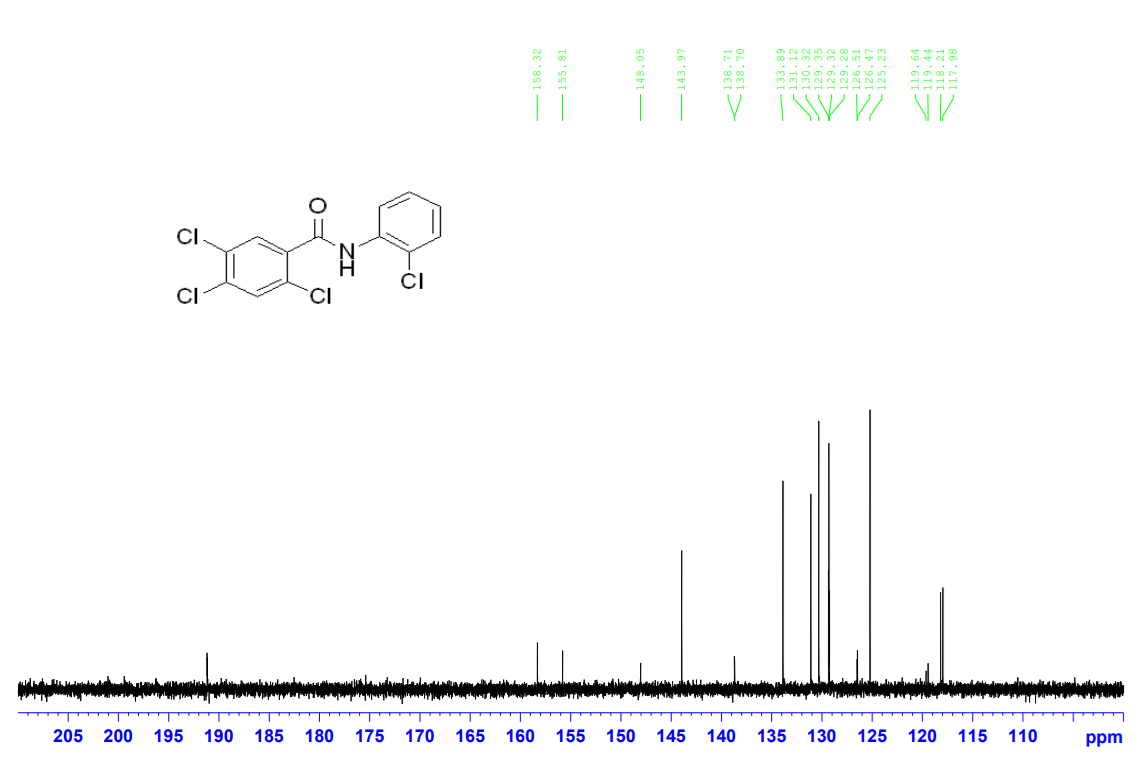


**Figure 27:** 13C NMR Spectrum of **2c**


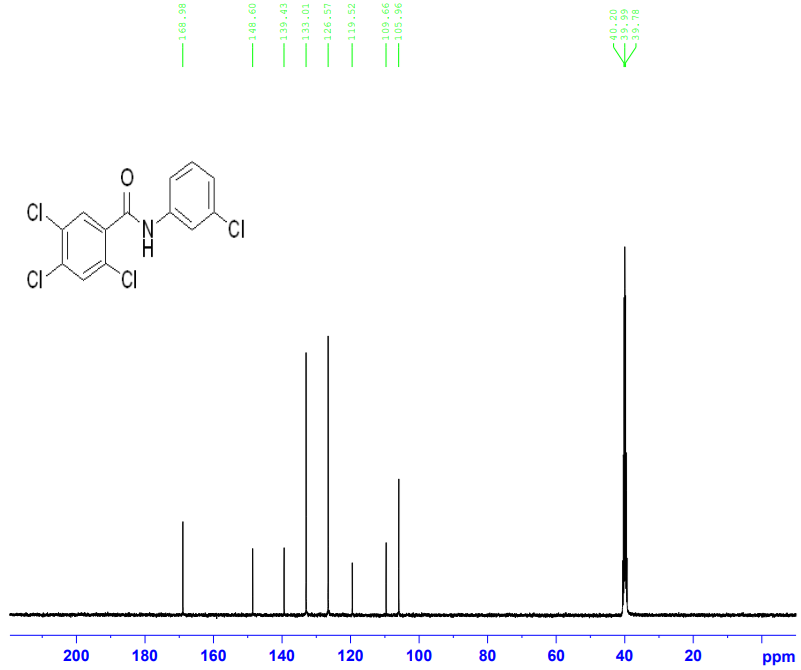


**Figure 28:** 13C NMR Spectrum of **2d**

**
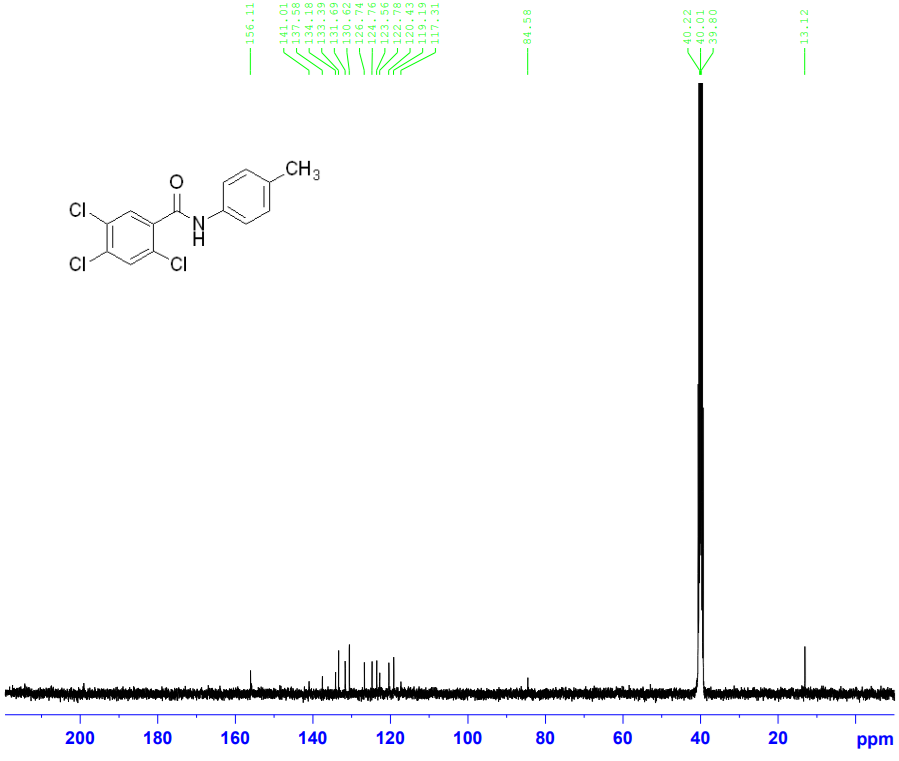
**

**Figure 29:** 13C NMR Spectrum of **2e**

**
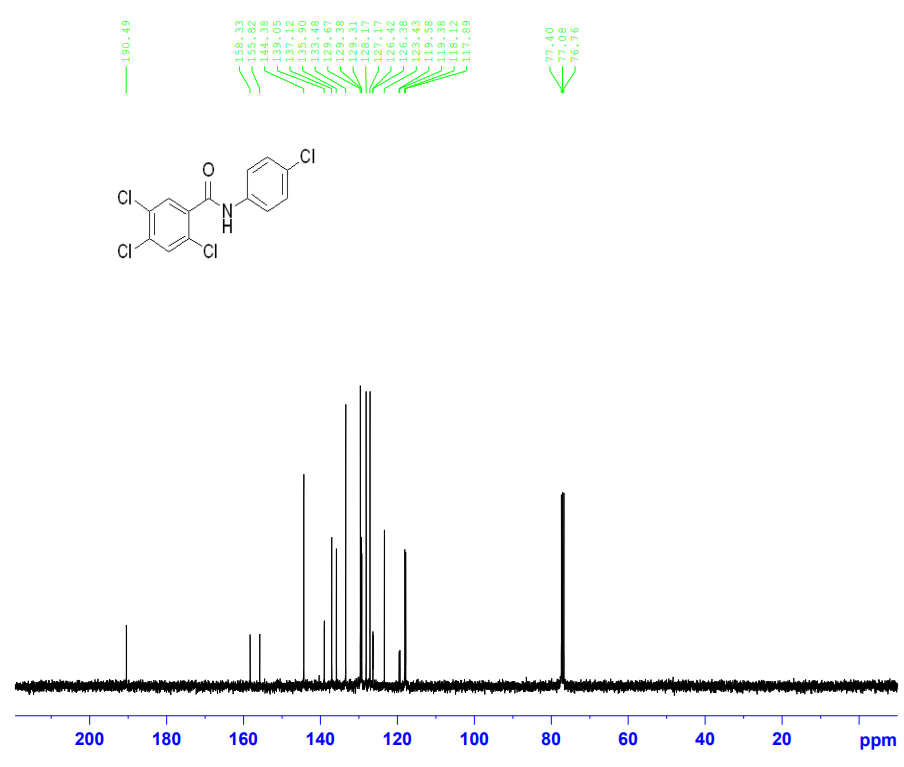
**

**Figure 30:** 13C NMR Spectrum of **2f**

**
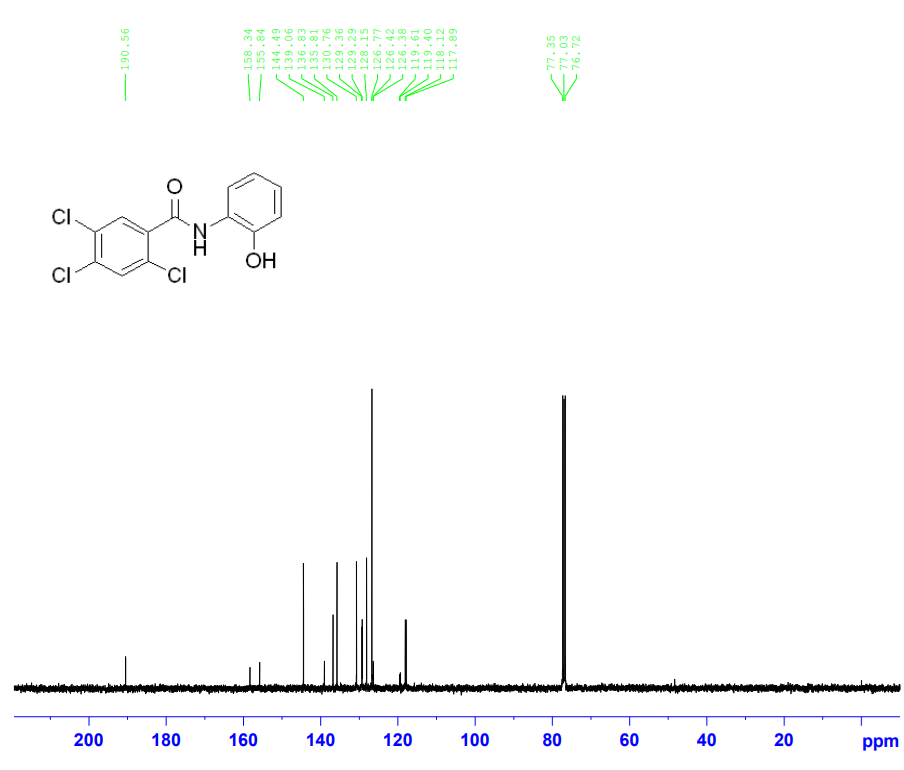
**

**Figure 31:** 13C NMR Spectrum of **2g**

**
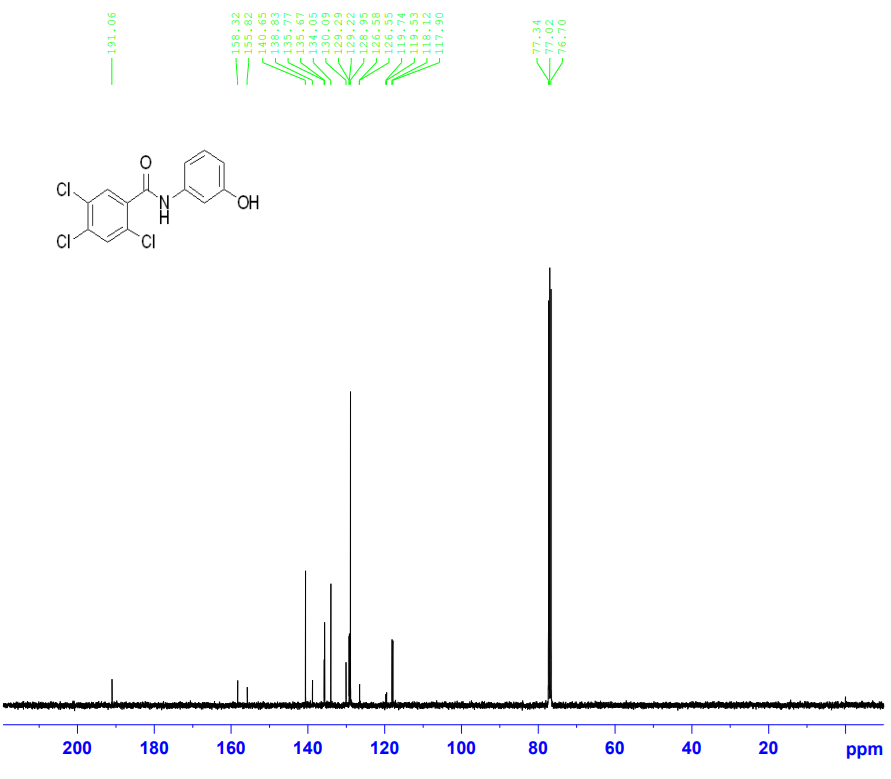
**

**Figure 32:** 13C NMR Spectrum of **2h**
